# Supplementary material
Source: PubMed Central journal article supplement (PMC6544359)
Supplement: NIHMS1022250-supplement-sup_.pdf [file NIHMS1022250-supplement-sup_.pdf]

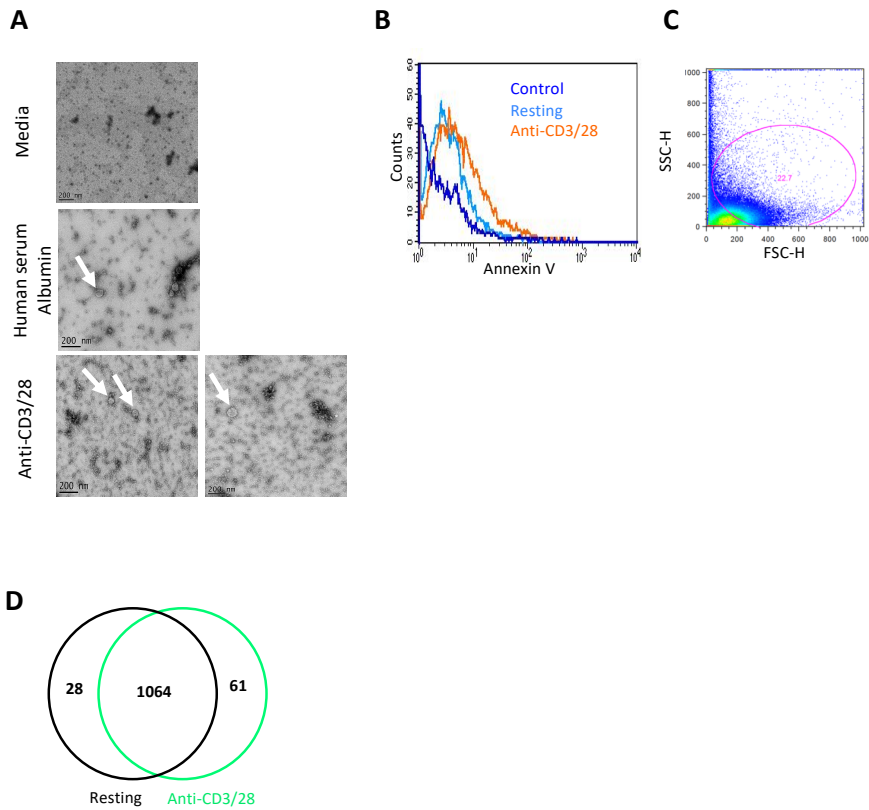

*Supplementary Figure 1.*

(A) Additional transmission electron microscopy images of exosomes isolated by differential ultracentrifugation from Jurkat T cells treated with media alone, human serum albumin, or anti-CD3/28 antibodies overnight. White arrows indicate exosome, bar 200 nm. (B) Exosomes collected from activated or resting Jurkat T cells were labeled with Annexin V-PE and analyzed by flow cytometry. (C) Exosomes were scored for Annexin V positivity after gating according to forward and side scattering. (D) Venn diagram showing the numbers of proteins detected at each experimental condition.

Supplementary table 1. Proteins that their levels were unchanged in exosomes derived from resting compared to activated T cells.

| Protein  | Description                                          | P-value     |
|----------|------------------------------------------------------|-------------|
| CD81     | CD81 antigen                                         | 0.3739      |
| CD47     | Leukocyte surface antigen CD47                       | 0.3344      |
| ADA      | Adenosine deaminase                                  | 0.0575      |
| LCK      | Tyrosine-protein kinase Lck                          | 0.3634      |
| RAN      | GTP-binding nuclear protein Ran                      | 0.3924      |
| RAB10    | Ras-related protein Rab-10                           | 0.4889      |
| ANXA1    | Annexin A1                                           | 0.3845      |
| ATP1A1   | Sodium/potassium-transporting ATPase subunit alpha-1 | 0.4036      |
| CCT2     | T-complex protein 1 subunit beta                     | 0.5201      |
| BANF1    | Barrier-to-autointegration factor                    | 0.3591      |
| ALDOA    | Fructose-bisphosphate aldolase A                     | 0.4003      |
| ANO6     | Anoctamin-6                                          | 0.5187      |
| CD99     | CD99 antigen                                         | 0.3739      |
| CDC42    | Cell division control protein 42 homolog             | 0.9814      |
| EEF2     | Elongation factor 2                                  | 0.3635      |
| DOCK2    | Dedicator of cytokinesis protein 2                   | 0.9527      |
| EZR      | Ezrin                                                | 0.3628      |
| DIP2B    | Disco-interacting protein 2 homolog B                | 0.5167      |
| HLA-B    | HLA class I histocompatibility antigen B             | 0.8544      |
| HIST1H1B | Histone H1.5                                         | 0.9775      |
| GAPDH    | Glyceraldehyde-3-phosphate dehydrogenase             | 0.9791      |
| FKBP4    | Peptidyl-prolyl cis-trans isomerase FKBP4            | 0.3727      |
| ITGA4    | Integrin alpha-4                                     | 0.1161      |
| ITK      | Tyrosine-protein kinase ITK/TSK                      | 0.0677      |
| LDHA     | L-lactate dehydrogenase A chain                      | 0.3723      |
| MAP4K4   | Mitogen-activated protein kinase kinase kinase 4     | 0.9958      |
| MYL6     | Myosin light polypeptide 6                           | 0.5110      |
| PPIA     | Peptidyl-prolyl cis-trans isomerase A                | 0.3662      |
| TUBB     | Tubulin beta chain                                   | 0.3739      |
| YWHAE    | 14-3-3 protein epsilon                               | 0.1451      |
| UBB      | Polyubiquitin-B                                      | 0.3432      |
| RPS7     | 40S ribosomal protein S7                             | 0.3470      |
| PHGDH    | D-3-phosphoglycerate dehydrogenase                   | 0.9910      |
| MSN      | Moesin                                               | 0.9980      |
| ACTA1    | Actin                                                | 0.4170      |
| CCT7     | T-complex protein 1 subunit eta                      | 0.2407      |
| CD2      | T-cell surface antigen CD2                           | 0.4101      |
| CD38     | ADP-ribosyl cyclase 1                                | 0.3834      |
| CSE1L    | Exportin-2                                           | 0.9898      |
| ENO1     | Alpha-enolase                                        | 0.3928      |
| CNP      | 2,3-cyclic-nucleotide 3-phosphodiesterase            | 0.5048      |
| GNB1     | Guanine nucleotide-binding protein G subunit beta-1  | 0.2372      |
| IGSF8    | Immunoglobulin superfamily member 8                  | 0.5213      |
| NME2     | Nucleoside diphosphate kinase B                      | 0.0369      |
| SPN      | Leukosialin                                          | 0.3726      |
| TPM3     | Tropomyosin alpha-3 chain                            | 0.3819      |
| PKM      | Pyruvate kinase PKM                                  | 0.4074      |
| RPS2     | 40S ribosomal protein S2                             | 0.37502458  |
| PFN1     | Profilin-1                                           | 0.379370394 |
| HSP90AB1 | Heat shock protein HSP 90-beta                       | 0.373900966 |
| MDH2     | Malate dehydrogenase                                 | 0.116128428 |
| SLC1A4   | Neutral amino acid transporter A                     | 0.623795308 |
| CFL1     | Cofilin-1                                            | 0.404425711 |
| BSG      | Basigin                                              | 0.986501525 |
| CALM1    | Calmodulin                                           | 0.388383993 |
| RAC2     | Ras-related C3 botulinum toxin substrate 2           | 0.996177413 |
| PGK1     | Phosphoglycerate kinase 1                            | 0.522329037 |
| RPL15    | 60S ribosomal protein L15                            | 0.380271423 |

Supplementary table 2. Proteins that their levels were higher in exosomes derived from activated T cells.

| Protein  | Description                                                                     | P-value |
|----------|---------------------------------------------------------------------------------|---------|
| RRAS2    | Ras-related protein R-Ras2                                                      | 0.0231  |
| ABI1     | Abl interactor 1                                                                | 0.0127  |
| RAF1     | RAF proto-oncogene serine/threonine-protein kinase                              | 0.0000  |
| CSNK1G2  | Casein kinase I isoform gamma-2                                                 | 0.0051  |
| PRMT5    | Protein arginine N-methyltransferase 5                                          | 0.0112  |
| DOCK10   | Dedicator of cytokinesis protein 10                                             | 0.0113  |
| PRKCH    | Protein kinase C eta type                                                       | 0.0016  |
| LAT      | Linker for activation of T-cells family member 1                                | 0.0021  |
| GAS7     | Growth arrest-specific protein 7                                                | 0.0134  |
| ATP6V1A  | V-type proton ATPase catalytic subunit A                                        | 0.0150  |
| RPS3A    | 40S ribosomal protein S3a                                                       | 0.0027  |
| HNRNPH1  | Heterogeneous nuclear ribonucleoprotein H                                       | 0.0150  |
| HNRNPL   | Heterogeneous nuclear ribonucleoprotein L                                       | 0.0066  |
| NRAS     | GTPase KRas N-terminally processed                                              | 0.0129  |
| NCSTN    | Nicastrin                                                                       | 0.0072  |
| CYFIP2   | Cytoplasmic FMR1-interacting protein 2                                          | 0.0032  |
| PIP4K2B  | Phosphatidylinositol 5-phosphate 4-kinase type-2 beta                           | 0.0052  |
| NPTN     | Neuroplastin                                                                    | 0.0095  |
| BRK1     | Protein BRICK1                                                                  | 0.0146  |
| SRP68    | Signal recognition particle subunit SRP68                                       | 0.0022  |
| SLC16A7  | Monocarboxylate transporter 2                                                   | 0.0001  |
| DDX3X    | ATP-dependent RNA helicase DDX3X                                                | 0.0119  |
| ARPC2    | Actin-related protein 2/3 complex subunit 2                                     | 0.0060  |
| AHSA1    | Activator of 90 kDa heat shock protein ATPase homolog 1                         | 0.0095  |
| HLA-A    | HLA class I histocompatibility antigen,                                         | 0.0074  |
| EIF2S1   | Eukaryotic translation initiation factor 2 subunit 1                            | 0.0183  |
| PRKCB    | Protein kinase C beta type                                                      | 0.0006  |
| TROVE2   | 60 kDa SS-A/Ro ribonucleoprotein                                                | 0.0051  |
| PRKCA    | Protein kinase C alpha type                                                     | 0.0006  |
| ATP6V1B2 | V-type proton ATPase subunit B, brain isoform                                   | 0.0194  |
| EEF1B2   | Elongation factor 1-beta                                                        | 0.0341  |
| RPL13    | 60S ribosomal protein L13                                                       | 0.0117  |
| PTBP1    | Polypyrimidine tract-binding protein 1                                          | 0.0198  |
| PSMC2    | 26S protease regulatory subunit 7                                               | 0.0082  |
| CCT6A    | T-complex protein 1 subunit zeta                                                | 0.0057  |
| EIF2S3   | Eukaryotic translation initiation factor 2 subunit 3                            | 0.0005  |
| RPL5     | 60S ribosomal protein L5                                                        | 0.0260  |
| CCT5     | T-complex protein 1 subunit epsilon                                             | 0.0011  |
| NCKAP1L  | Nck-associated protein 1-like                                                   | 0.0067  |
| RPS18    | 40S ribosomal protein S18                                                       | 0.0046  |
| CDK5     | Cyclin-dependent kinase 5                                                       | 0.0042  |
| PRKCQ    | Protein kinase C theta type                                                     | 0.0146  |
| PRKCD    | Protein kinase C delta                                                          | 0.0003  |
| PSMD2    | 26S proteasome non-ATPase regulatory subunit 2                                  | 0.0026  |
| EIF3I    | Eukaryotic translation initiation factor 3 subunit I                            | 0.0146  |
| GNA13    | Guanine nucleotide-binding protein subunit alpha-13                             | 0.0135  |
| RFTN1    | Raftlin                                                                         | 0.0016  |
| PTPRCAP  | Protein tyrosine phosphatase receptor type C-associated protein                 | 0.0148  |
| PCBP1    | Poly(rC)-binding protein 1                                                      | 0.0114  |
| PA2G4    | Proliferation-associated protein 2G4                                            | 0.0084  |
| TBC1D10B | TBC1 domain family member 10B                                                   | 0.0063  |
| CYFIP1   | Cytoplasmic FMR1-interacting protein 1                                          | 0.0168  |
| APBB1IP  | Amyloid beta A4 precursor protein-binding family B member 1-interacting protein | 0.0378  |
| ELMO1    | Engulfment and cell motility protein 1                                          | 0.0007  |
| TAOK3    | Serine/threonine-protein kinase TAO3                                            | 0.0241  |
| UNC45A   | Protein unc-45 homolog A                                                        | 0.0222  |
| DEF6     | Differentially expressed in FDCP 6 homolog                                      | 0.0002  |
| IL1RAP   | Interleukin-1 receptor accessory protein                                        | 0.0225  |
| LNPEP    | Leucyl-cystinyl aminopeptidase                                                  | 0.0404  |

Supplementary table 3. Proteins that their levels were higher in exosome derived from resting T cells.

| Protein  | Description                                              | P-value |
|----------|----------------------------------------------------------|---------|
| CD3G     | T-cell surface glycoprotein CD3 gamma chain              | 0.0046  |
| KIF20A   | Kinesin-like protein KIF20A                              | 0.0020  |
| FLOT2    | Flotillin-2                                              | 0.0266  |
| SEPT7    | Septin-7                                                 | 0.0171  |
| VTA1     | Vacuolar protein sorting-associated protein VTA1 homolog | 0.0047  |
| KIF2A    | Kinesin-like protein KIF2A                               | 0.0027  |
| PELI2    | E3 ubiquitin-protein ligase pellino homolog 2            | 0.0038  |
| SH3KBP1  | SH3 domain-containing kinase-binding protein 1           | 0.0197  |
| ARL8B    | ADP-ribosylation factor-like protein 8B                  | 0.0039  |
| PRC1     | Protein regulator of cytokinesis 1                       | 0.0012  |
| CTNNA1   | Catenin alpha-1                                          | 0.0129  |
| SDCBP    | Syntenin-1                                               | 0.0195  |
| CIT      | Citron Rho-interacting kinase                            | 0.0118  |
| SLC9A3R1 | Na(+)/H(+) exchange regulatory cofactor NHE-RF1          | 0.0295  |
| VPS4B    | Vacuolar protein sorting-associated protein 4B           | 0.0011  |
| KIF4A    | Chromosome-associated kinesin KIF4A                      | 0.0046  |
| FMNL1    | Formin-like protein 1                                    | 0.0025  |
| FLNA     | Filamin-A                                                | 0.0140  |
| CXCR4    | C-X-C chemokine receptor type 4                          | 0.0152  |
| NEDD4    | E3 ubiquitin-protein ligase NEDD4                        | 0.0074  |
| UBASH3A  | Ubiquitin-associated and SH3 domain-containing protein A | 0.0013  |
| MPP1     | 55 kDa erythrocyte membrane protein                      | 0.0112  |
| KIF23    | Kinesin-like protein KIF23                               | 0.0141  |
| KIF14    | Kinesin-like protein KIF14                               | 0.0233  |
| CEP55    | Centrosomal protein of 55 kDa                            | 0.0202  |
| ATP11C   | Probable phospholipid-transporting ATPase IG             | 0.0047  |
| RACGAP1  | Rac GTPase-activating protein 1                          | 0.0171  |
| CLIC4    | Chloride intracellular channel protein 4                 | 0.0231  |
